# Supplementary material for: Synthesis, structure, spectroscopy of four novel supramolecular complexes and cytotoxicity study by application of multiple parallel perfused microbioreactors
Source: Royal Society of Chemistry journal article supplement (doi:10.1039/c3nj01646c), 2014-01-01
Supplement: c3nj01646c1.pdf [file c3nj01646c1.pdf]

Cite this: DOI: 10.1039/c0xx00000x

www.rsc.org/xxxxxx

ARTICLE TYPE

## Synthesis, structure, spectroscopy of four novel supramolecular complexes and cytotoxicity study by application of multiple parallel perfused microbioreactors

Qing-Lin Guan<sup>a,b</sup>, Zhi Liu<sup>b</sup>, Wen-Juan Wei<sup>a</sup>, Jing Liu<sup>\*a</sup>, Yong-Heng Xing<sup>\*b</sup>, Rui Zhang<sup>b</sup>, Ya-Nan Hou<sup>b</sup>, Xuan Wang<sup>b</sup> and Feng-Ying Bai<sup>b</sup>

Received (in XXX, XXX) Xth XXXXXXXXXX 20XX, Accepted Xth XXXXXXXXXX 20XX

DOI: 10.1039/b000000x

**Table S1** Selected bond lengths (Å) and angles (°) of the complexes **1-4**.

**Fig. S1** The Solid-state IR spectra of complex **1** at a room temperature.

**Fig. S2** The Solid-state IR spectra of complex **2** at a room temperature.

**Fig. S3** The Solid-state IR spectra of complex **3** at a room temperature.

**Fig. S4** The Solid-state IR spectra of complex **4** at a room temperature.

**Fig. S5** The UV-Vis spectra for complexes **1** and **2**.

**Fig. S6** The UV-Vis spectra for complexes **3** and **4**.

**Fig. S7** PXRD powder patterns: a experimental PXRD for complex **1**, b the simulated PXRD pattern calculated from single-crystal structure of complex **1**.

**Fig. S8** PXRD powder patterns: a experimental PXRD for complex **2**, b the simulated PXRD pattern calculated from single-crystal structure of complex **2**.

**Fig. S9** PXRD powder patterns: a experimental PXRD for complex **3**, b the simulated PXRD pattern calculated from single-crystal structure of complex **3**.

**Fig. S10** PXRD powder patterns: a experimental PXRD for complex **4**, b the simulated PXRD pattern calculated from single-crystal structure of complex **4**.

**Fig. S11** Solid-state photoluminescence spectra of complex **1** at room temperature.

**Fig. S12** Solid-state photoluminescence spectra of complex **2** at room temperature.

**Fig. S13** Solid-state photoluminescence spectra of complex **3** at room temperature.

**Fig. S14** Solid-state photoluminescence spectra of complex **4** at room temperature.

**Table S1** Selected bond lengths (Å) and angles (°) of the complexes **1-4**.

| Complex 1   |            |             |            |             |           |
|-------------|------------|-------------|------------|-------------|-----------|
| Cd-N4       | 2.290(8)   | Cd-N7       | 2.311(7)   | Cd-N8       | 2.331(16) |
| Cd-N3       | 2.296(18)  | Cd-N9       | 2.359(8)   | Cd-N2       | 2.364(9)  |
| N4-Cd-N7    | 97.6(3)    | N4-Cd-N8    | 109.3(3)   | N7-Cd-N8    | 70.6(3)   |
| N4-Cd-N3    | 72.4(3)    | N7-Cd-N3    | 115.2(3)   | N8-Cd-N3    | 173.9(2)  |
| N4-Cd-N9    | 96.5(3)    | N7-Cd-N9    | 140.6(3)   | N8-Cd-N9    | 70.0(3)   |
| N3-Cd-N9    | 104.1(3)   | N4-Cd-N2    | 140.9(3)   | N7-Cd-N2    | 98.0(3)   |
| N8-Cd-N2    | 109.7(3)   | N3-Cd-N2    | 68.5(3)    | N9-Cd-N2    | 93.8(3)   |
| Complex 2   |            |             |            |             |           |
| Cd-N3       | 2.339(17)  | Cd-N9       | 2.305(8)   | Cd-N7       | 2.309(9)  |
| Cd-N8       | 2.256(16)  | Cd-N4       | 2.335(8)   | Cd-N2       | 2.369(8)  |
| N3-Cd-N9    | 116.5(3)   | N3-Cd-N7    | 103.4(3)   | N9-Cd-N7    | 140.1(3)  |
| N3-Cd-N8    | 175.1(3)   | N9-Cd-N8    | 68.3(3)    | N7-Cd-N8    | 71.8(3)   |
| N3-Cd-N4    | 69.9(3)    | N9-Cd-N4    | 98.6(3)    | N7-Cd-N4    | 93.7(3)   |
| N8-Cd-N4    | 109.4(3)   | N3-Cd-N2    | 70.9(3)    | N9-Cd-N2    | 98.7(3)   |
| N7-Cd-N2    | 95.1(3)    | N8-Cd-N2    | 109.7(3)   | N4-Cd-N2    | 140.7(3)  |
| Complex 3   |            |             |            |             |           |
| Zn-N6       | 2.0269(17) | Zn-N3       | 2.0729(18) | Zn-N2       | 2.168(2)  |
| Zn-O3       | 2.2155(15) | Zn-O2       | 2.2206(16) | Zn-N4       | 2.241(2)  |
| N6-Zn-N3    | 170.98(8)  | N6-Zn-N2    | 110.68(8)  | N3-Zn-N2    | 76.25(8)  |
| N6-Zn-O3    | 75.56(6)   | N3-Zn-O3    | 98.65(6)   | N2-Zn-O3    | 93.51(7)  |
| N6-Zn-O2    | 75.78(6)   | N3-Zn-O2    | 109.92(6)  | N2-Zn-O2    | 95.56(7)  |
| O3-Zn-O2    | 151.32(6)  | N6-Zn-N4    | 98.66(7)   | N3-Zn-N4    | 74.54(8)  |
| N2-Zn-N4    | 150.66(8)  | O3-Zn-N4    | 93.54(8)   | O2-Zn-N4    | 91.75(8)  |
| Complex 4   |            |             |            |             |           |
| Zn1-N8      | 2.056(7)   | Zn1-N3      | 2.071(7)   | Zn1-N4      | 2.117(7)  |
| Zn1-N7      | 2.137(7)   | Zn1-N9      | 2.190(7)   | Zn1-N2      | 2.199(7)  |
| Zn2-O12     | 2.055(7)   | Zn2-O8      | 2.088(6)   | Zn2-O4      | 2.132(6)  |
| Zn2-N13     | 2.167(7)   | Zn2-N12     | 2.166(7)   | Zn2-N11     | 2.181(7)  |
| Zn3-O19     | 2.071(6)   | Zn3-O24     | 2.074(7)   | Zn3-N14     | 2.100(8)  |
| Zn3-O16     | 2.114(6)   | Zn3-N16     | 2.160(7)   | Zn3-N15     | 2.170(8)  |
| N8-Zn1-N3   | 173.6(3)   | N8-Zn1-N4   | 106.4(3)   | N3-Zn1-N4   | 76.0(3)   |
| N8-Zn1-N7   | 76.0(3)    | N3-Zn1-N7   | 109.9(3)   | N4-Zn1-N7   | 94.9(3)   |
| N8-Zn1-N9   | 75.2(3)    | N3-Zn1-N9   | 98.9(3)    | N4-Zn1-N9   | 93.0(3)   |
| N7-Zn1-N9   | 151.2(3)   | N8-Zn1-N2   | 101.9(3)   | N3-Zn1-N2   | 75.6(3)   |
| N4-Zn1-N2   | 151.6(3)   | N7-Zn1-N2   | 94.4(3)    | N9-Zn1-N2   | 91.7(3)   |
| O12-Zn2-O8  | 95.0(3)    | O12-Zn2-O4  | 94.3(3)    | O8-Zn2-O4   | 165.8(3)  |
| O12-Zn2-N13 | 78.7(3)    | O8-Zn2-N13  | 104.7(3)   | O4-Zn2-N13  | 87.6(3)   |
| O12-Zn2-N12 | 168.7(3)   | O8-Zn2-N12  | 78.0(3)    | O4-Zn2-N12  | 94.3(3)   |
| N13-Zn2-N12 | 94.4(3)    | O12-Zn2-N11 | 99.5(3)    | O8-Zn2-N11  | 91.6(3)   |
| O4-Zn2-N11  | 76.3(3)    | N13-Zn2-N11 | 163.6(3)   | N12-Zn2-N11 | 89.6(3)   |

|             |          |             |          |             |          |
|-------------|----------|-------------|----------|-------------|----------|
| O19-Zn3-O24 | 89.2(3)  | O19-Zn3-N14 | 101.5(3) | O24-Zn3-N14 | 93.5(3)  |
| O19-Zn3-O16 | 175.4(3) | O24-Zn3-O16 | 95.2(3)  | N14-Zn3-O16 | 76.9(3)  |
| O19-Zn3-N16 | 89.9(3)  | O24-Zn3-N16 | 77.4(3)  | N14-Zn3-N16 | 165.4(3) |
| O16-Zn3-N16 | 92.4(3)  | O19-Zn3-N15 | 78.5(3)  | O24-Zn3-N15 | 163.6(3) |
| N14-Zn3-N15 | 99.6(3)  | O16-Zn3-N15 | 97.4(3)  | N16-Zn3-N15 | 91.5(3)  |

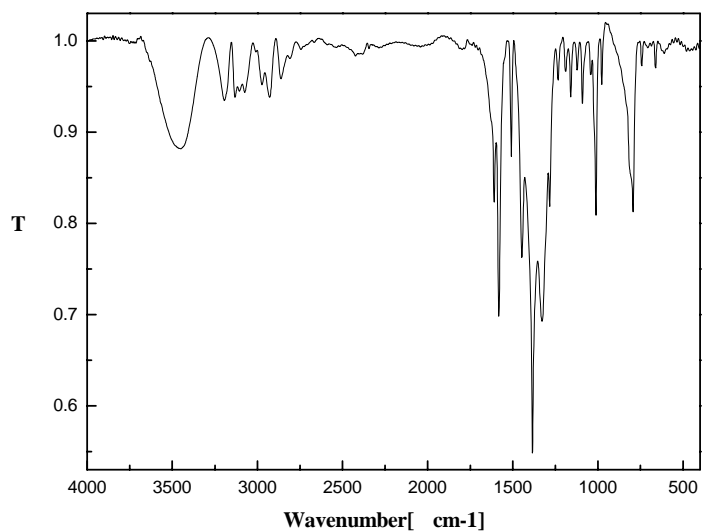

**Fig. S1** The Solid-state IR spectra of complex **1** at a room temperature.

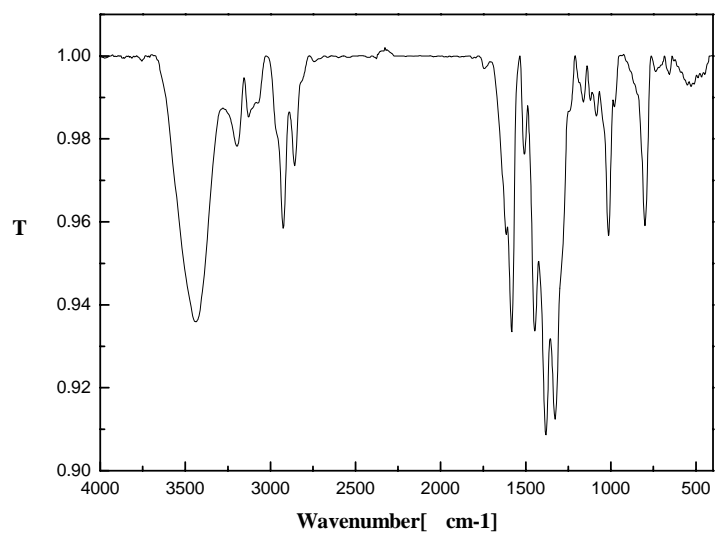

**Fig. S2** The Solid-state IR spectra of complex **2** at a room temperature.

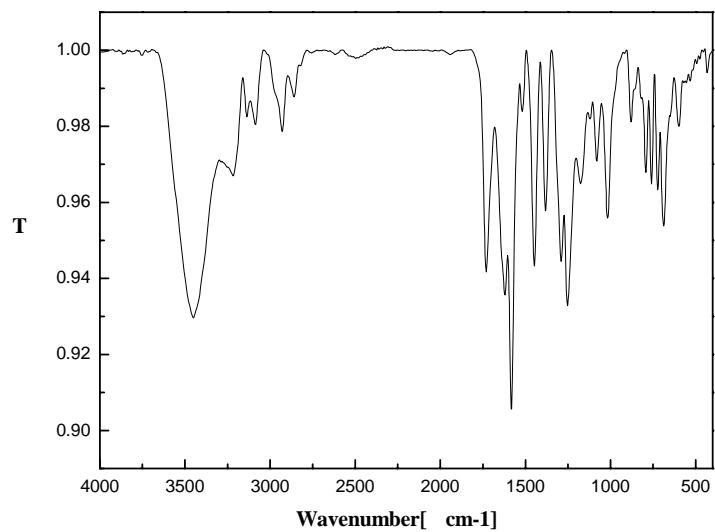

**Fig. S3** The Solid-state IR spectra of complex **3** at a room temperature.

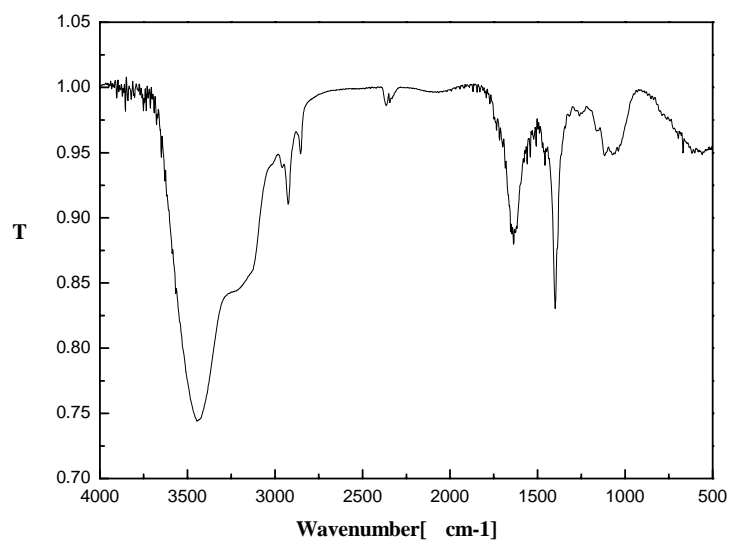

**Fig. S4** The Solid-state IR spectra of complex **4** at a room temperature.

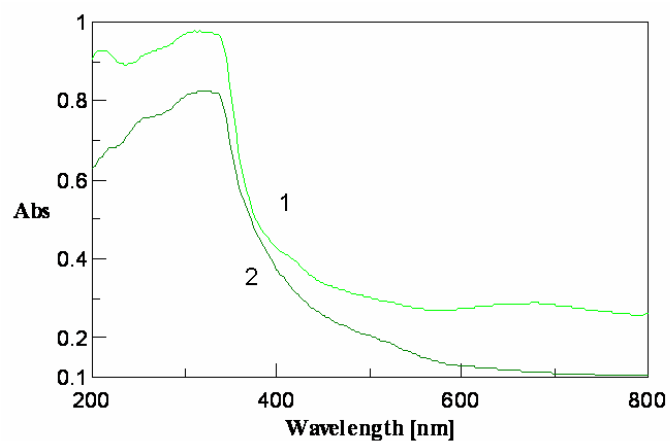

**Fig. S5** The UV-Vis spectra for complexes **1** and **2**.

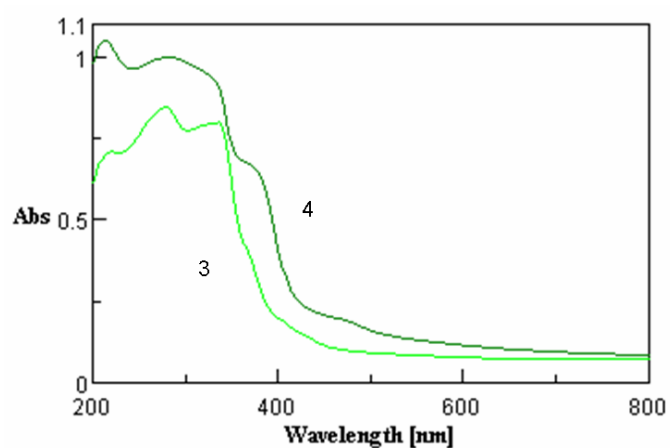

**Fig. S6** The UV-Vis spectra for complexes **3** and **4**.

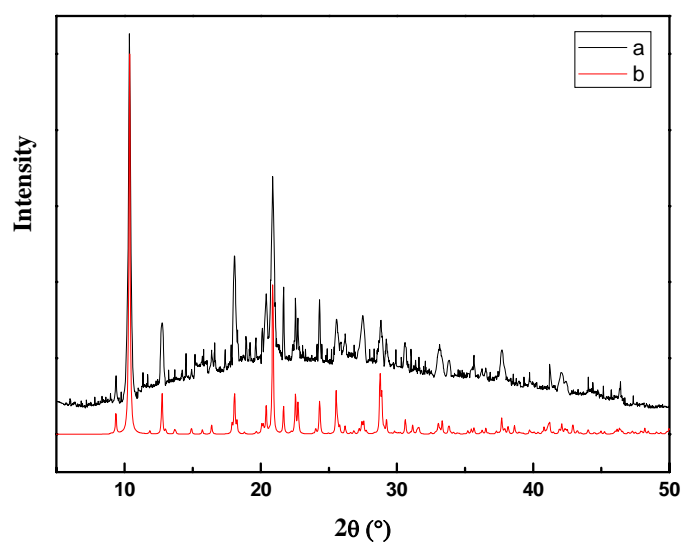

**Fig. S7** PXRD powder patterns: a experimental PXRD for complex **1**, b the simulated PXRD pattern calculated from single-crystal structure of complex **1**.

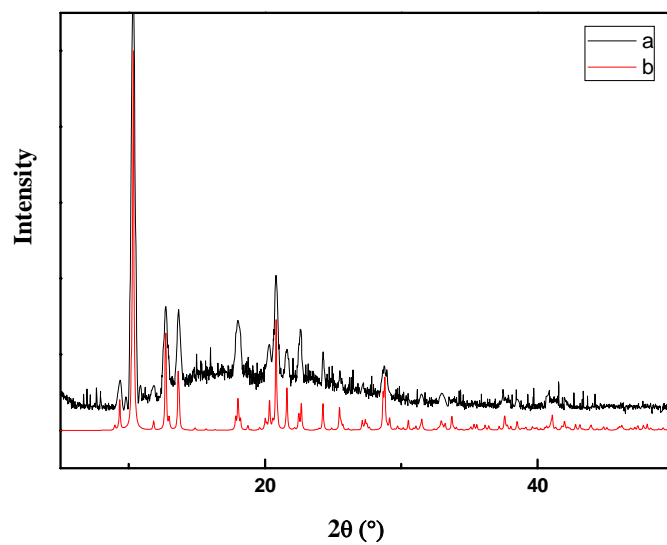

**Fig. S8** PXR D powder patterns: a experimental PXR D for complex **2**, b the simulated PXR D pattern calculated from single-crystal structure of complex **2**.

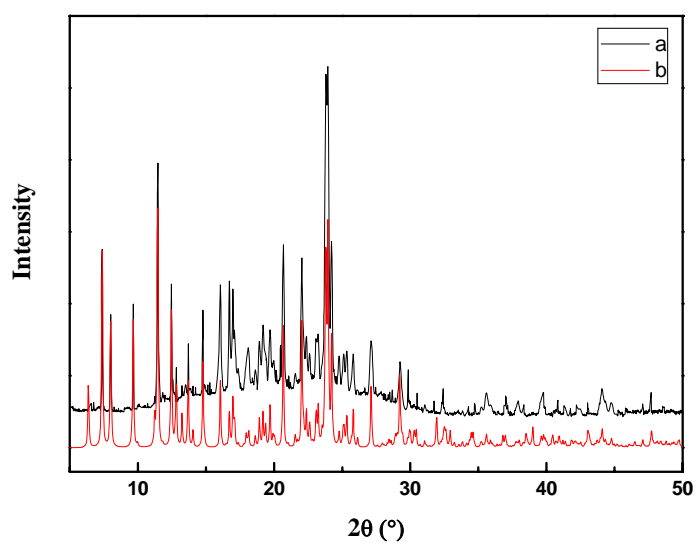

**Fig. S9** PXR D powder patterns: a experimental PXR D for complex **3**, b the simulated PXR D pattern calculated from single-crystal structure of complex **3**.

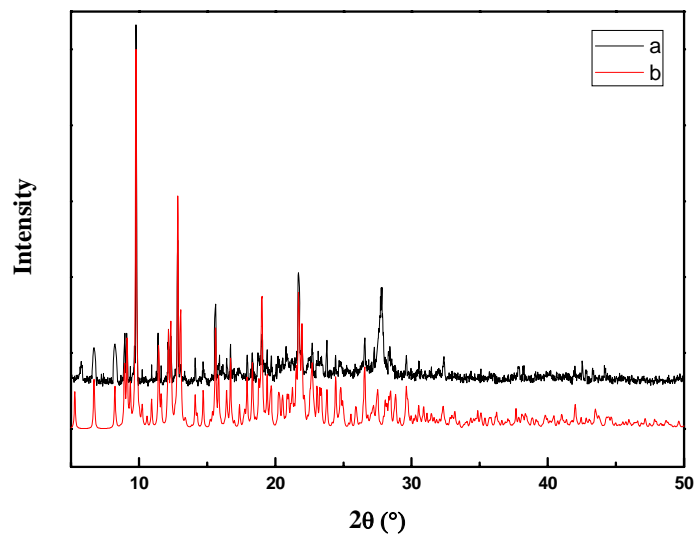

**Fig. S10** PXRD powder patterns: a experimental PXRD for complex **4**, b the simulated PXRD pattern calculated from single-crystal structure of complex **4**.

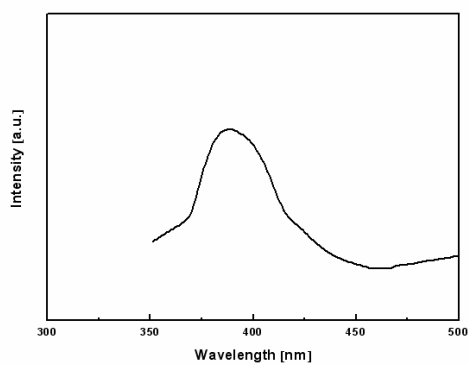

**Fig. S11** Solid-state photoluminescence spectra of complex **1** at room temperature.

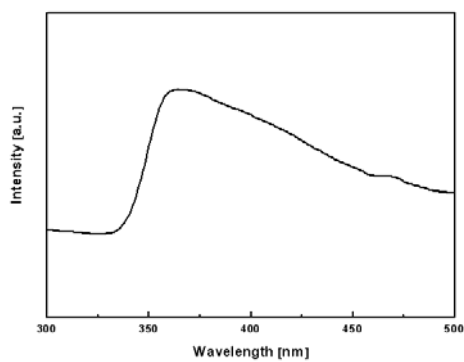

**Fig. S12** Solid-state photoluminescence spectra of complex **2** at room temperature.

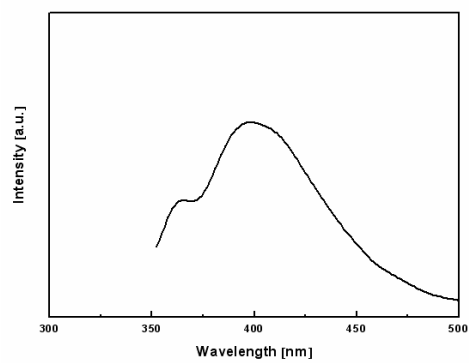

**Fig. S13** Solid-state photoluminescence spectra of complex **3** at room temperature.

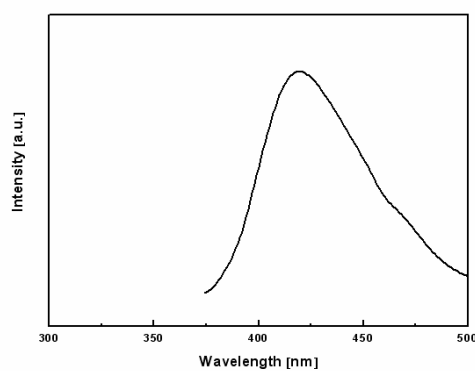

**Fig. S14** Solid-state photoluminescence spectra of complex **4** at room temperature.
